# Supplementary material
Source: PubMed Central journal article supplement (PMC4356821)
Supplement: AAC.03972-14_zac004153814so1.pdf [file AAC.03972-14_zac004153814so1.pdf]

## Supporting Information

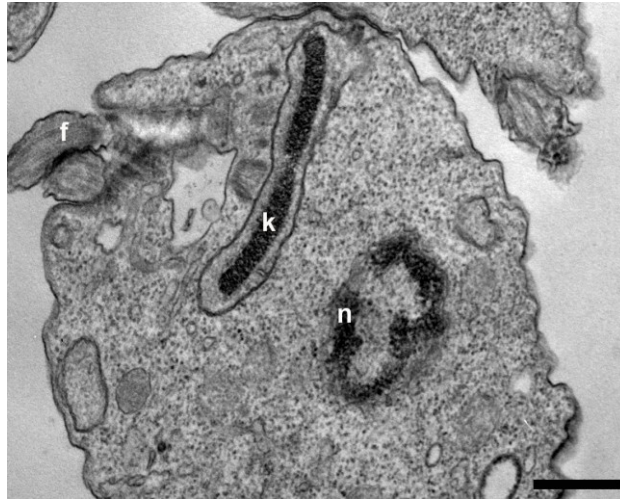

**FIG S1:** Transmission electron microscopy image of untreated *T. cruzi* epimastigote with normal ultrastructure. Kinetoplast (k), nucleus (n), and flagellum (f) are indicated.

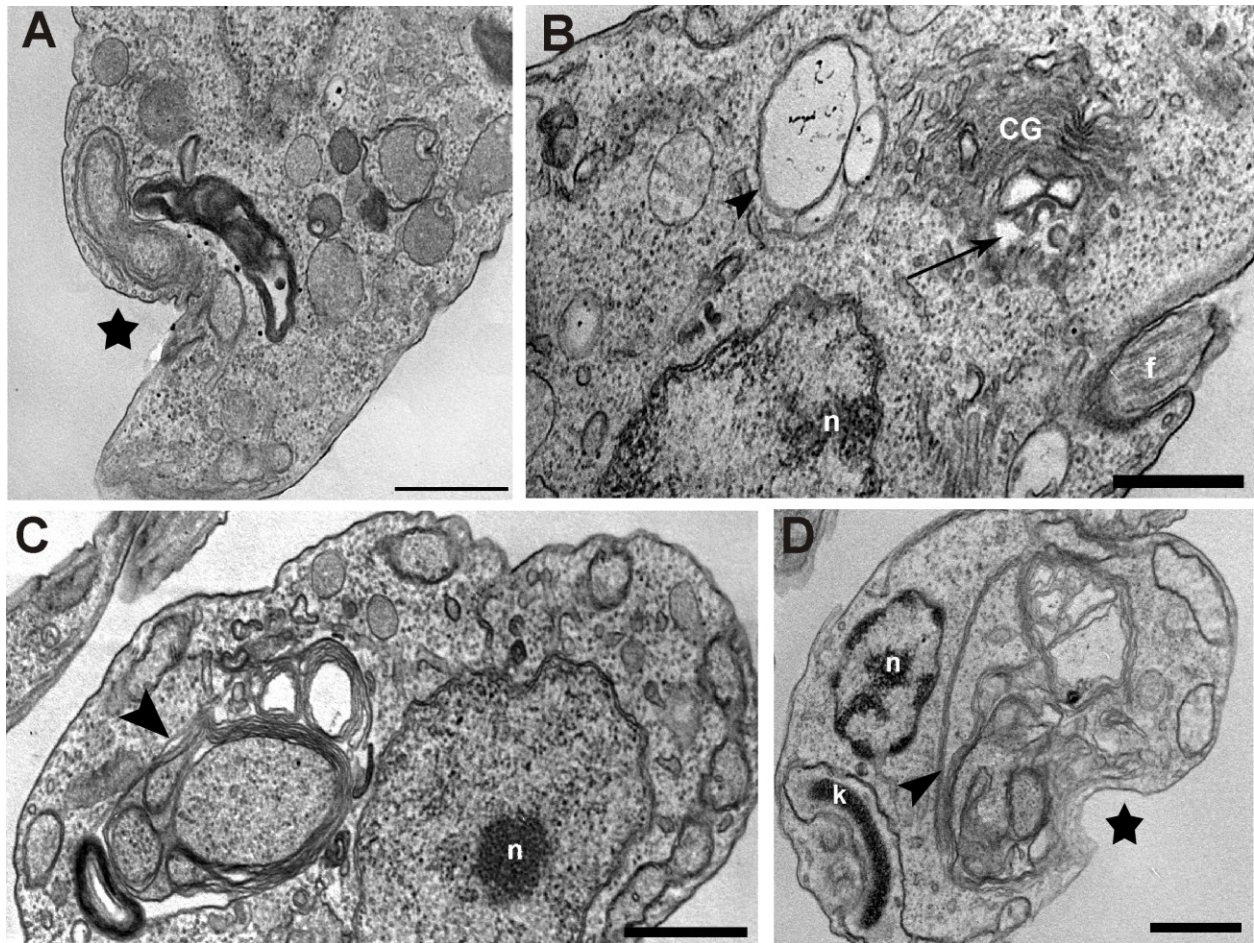

**FIG S2:** Transmission electron microscopy images of *T. cruzi* epimastigotes treated with 4.6  $\mu\text{M}$  SQ109 for 24 hours (A, B) and 48 hours (C,D) showing Golgi complex alterations (arrow), vacuole and autophagosome formation (arrowhead) and plasma membrane depression (stars).

Bars: 0.5  $\mu\text{m}$ .

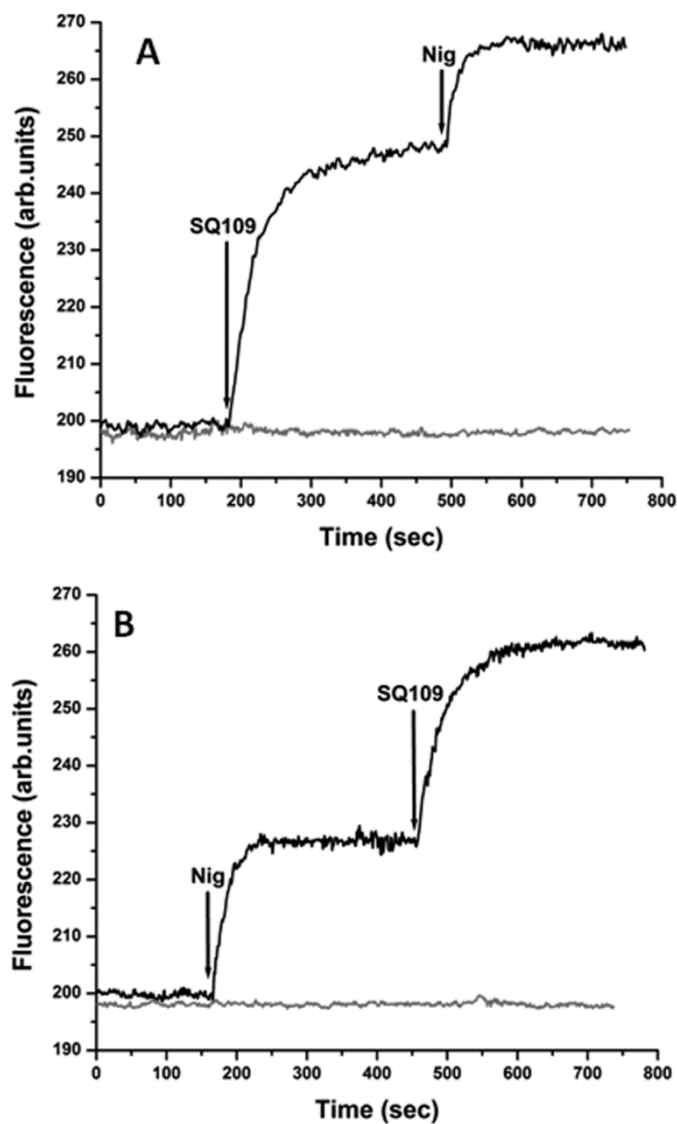

**FIG S3:** Effects of SQ109 and nigericin on acidine orange fluorescence (increasing fluorescence correlates with alkalization). A, SQ109 (10  $\mu$ M) followed by nigericin (10  $\mu$ M). B, Nigericin (10  $\mu$ M) followed by SQ109 (10  $\mu$ M).

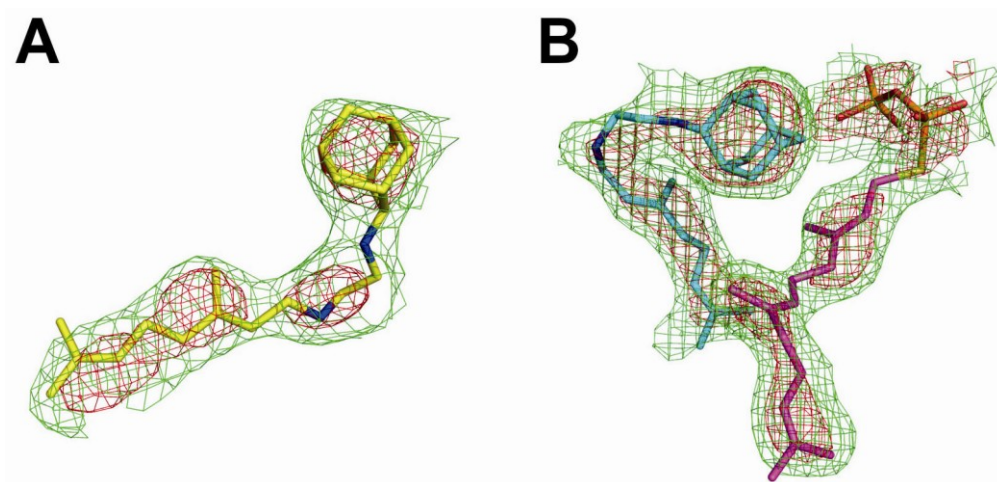

**FIG S4:**Fo-Fc omit electron density maps contoured at 1 Å (green) and 3 Å (red). **A**, SQ109 in HsSQS. **B**, FSPP+SQ109 in TcSQS.

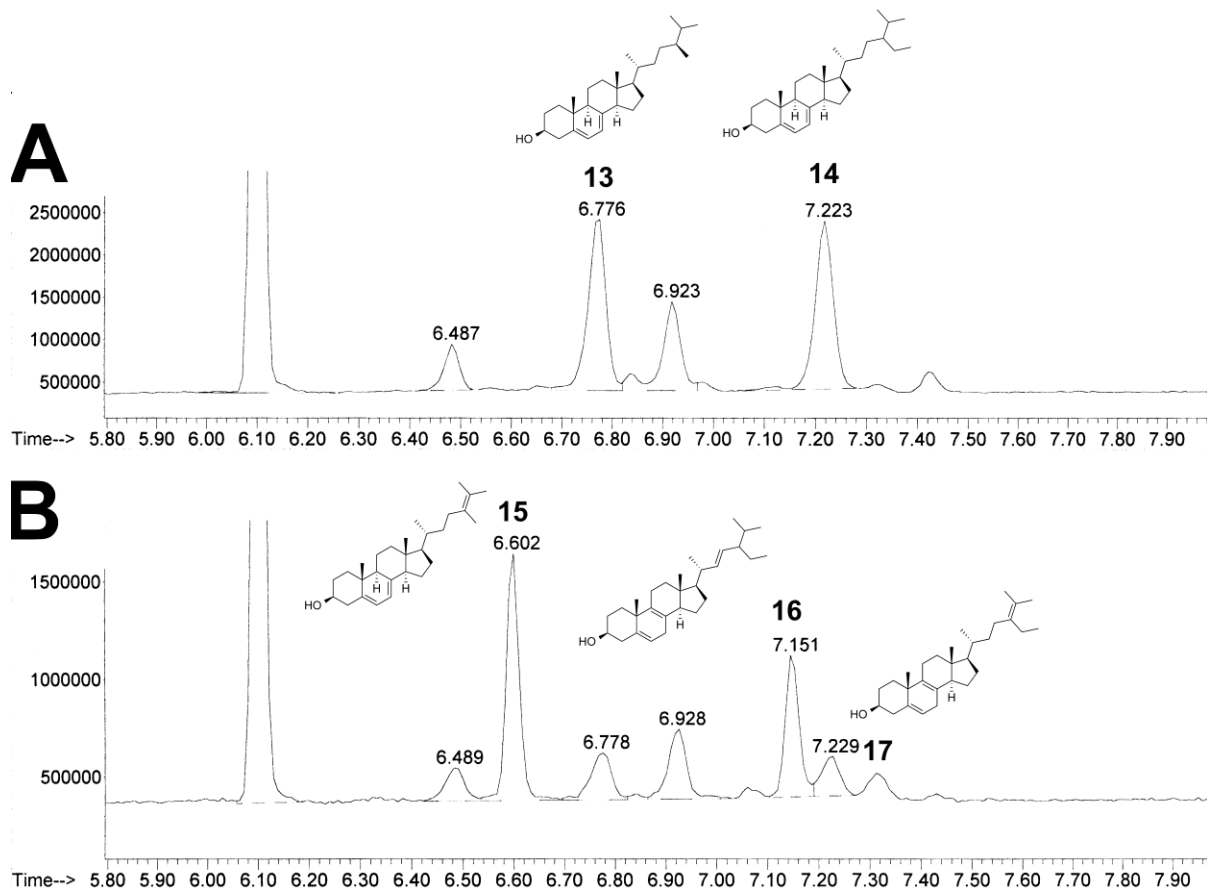

**FIG S5:** GCMS results for *T. cruzi* epimastigote sterols (as the trimethylsilyl ethers) without and with SQ109 treatment. A, Without SQ109. B, With SQ109 (6  $\mu$ M). The major sterols in the untreated cells have saturated side-chains (**13,14**). New species (**15,16,17**) appear in the presence of SQ109 and have unsaturated side-chains.

**Table S1. Summary of data processing and refinement statistics of TcSQS complex crystals.**

| Name                                           | TcSQS-SQ109             | HsSQS-SQ109            |
|------------------------------------------------|-------------------------|------------------------|
| PDB code                                       | 3WSB                    | 3WSA                   |
| <b>Data collection</b>                         |                         |                        |
| Resolution (Å)                                 | 25-2.40<br>(2.49-2.40)  | 25-2.90<br>(3.00-2.90) |
| Space group                                    | $P2_12_12_1$            | $P2_1$                 |
| Unit-cell                                      |                         |                        |
| $a / b / c$ (Å)                                | 79.36 / 130.57 / 144.63 | 85.75 / 154.01 / 90.62 |
| $\beta$ (°)                                    | 90.00                   | 91.38                  |
| No. of reflections                             |                         |                        |
| Measured                                       | 281502 (25911)          | 190318 (16426)         |
| Unique                                         | 57874 (5288)            | 48463 (4212)           |
| Completeness (%)                               | 97.1 (90.0)             | 93.5 (81.1)            |
| $R_{\text{merge}}$ (%) <sup>a</sup>            | 5.7 (44.4)              | 11.1 (41.4)            |
| Mean $I/\sigma(I)$                             | 26.1 (2.3)              | 10.9 (1.8)             |
| Multiplicity                                   | 4.9 (3.8)               | 3.9 (2.9)              |
| <b>Refinement</b>                              |                         |                        |
| $R_{\text{work}}$ (%)                          | 21.6 (29.6)             | 20.6 (31.3)            |
| $R_{\text{free}}$ (%)                          | 27.7 (34.1)             | 26.1 (33.0)            |
| Geometry deviations                            |                         |                        |
| Bond lengths (Å)                               | 0.007                   | 0.004                  |
| Bond angles (°)                                | 1.16                    | 0.77                   |
| No. of atoms / Mean B-values (Å <sup>2</sup> ) |                         |                        |
| Protein atoms                                  | 11005 (45.7)            | 15965 (44.0)           |
| Water molecules                                | 433 (57.1)              | 221 (30.3)             |
| SQ109 atoms                                    | 96 (70.3)               | 96 (65.3)              |
| FSPP atoms                                     | 96 (67.3)               |                        |
| Ramachandran plot (%)                          |                         |                        |
| Most favored                                   | 94.0                    | 94.5                   |
| Additionally allowed                           | 5.8                     | 5.2                    |
| Disallowed                                     | 0.2                     | 0.4                    |

Values in parentheses are for the highest resolution shell.

$$^a R_{\text{merge}} = \frac{\sum_{hkl} \sum_i |I_i(hkl) - \langle I(hkl) \rangle|}{\sum_{hkl} \sum_i I_i(hkl)}.$$
